# Supplementary material for: InSilico DB genomic datasets hub: an efficient starting point for analyzing genome-wide studies in GenePattern, Integrative Genomics Viewer, and R/Bioconductor
Source: Springer Nature journal article supplement (doi:10.1186/gb-2012-13-11-r104), 2012-11-18
Supplement: 13059_2012_2971_MOESM4_ESM.pdf [file 13059_2012_2971_MOESM4_ESM.pdf]

(a)

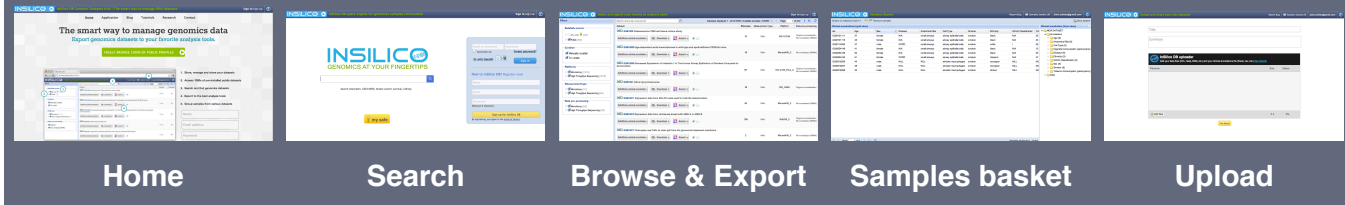

(b)

https://insilicodb.org

**INSILICO** InSilico DB query engine for genomics samples information **colinm**

**Filters** ESTROGEN Datasets displayed 1 - 50 of 153 | Available samples: 2095 | Page 1 of 4

**DataSets source**

- My safe [2/2]
  - My datasets
  - Datasets shared with me
- Public [3/3]
  - GEO
  - InSilico
  - Community

**Curation**

- All
- Manually curated
- To curate

**Platforms**

- MicroArray [9/11]
  - HG-U133A
  - HG-U133\_Plus\_2
  - HG-U133A\_2
  - HT\_HG-U133A
  - HG-U133B
  - Rat230\_2
  - Mouse430\_2
  - HG\_U95A
  - HG\_U95Av2
  - RG\_U34A

| Title                                                                                                                           | Relev... | #S... | Meas Type | Platform                 | Data normalization                          | Sharing |
|---------------------------------------------------------------------------------------------------------------------------------|----------|-------|-----------|--------------------------|---------------------------------------------|---------|
| <b>GEO GSE25316</b> FoxA1 is a critical determinant of Estrogen Receptor function and endocrine response                        | 100%     | 16    | RNA       | Illumina HumanHT-12 V3.0 | Original normalization                      | Public  |
| <b>GEO GSE25314</b> FoxA1 is a critical determinant of Estrogen Receptor function and endocrine response (part I)               | 100%     | 16    | RNA       | Illumina HumanHT-12 V3.0 | Original normalization                      | Public  |
| <b>GEO GSE22213</b> Cooperative interaction between retinoic acid receptor-alpha and estrogen receptor in breast cancer.        | 83%      | 12    | RNA       | Illumina HumanHT-12 V3.0 | Original normalization                      | Public  |
| <b>GEO GSE11791</b> Estrogen- and Myc-regulated genes in MCF-7 breast cancer cells                                              | 83%      | 15    | RNA       | HG-U133_Plus_2           | Original normalization Re-normalized (IRMA) | Public  |
| <b>GEO GSE9117</b> Expression data from rat uterine myometrium -effect of estrogen                                              | 83%      | 4     | RNA       | RG_U34A                  | Original normalization Re-normalized (IRMA) | Public  |
| <b>GEO GSE19639</b> Hyperactivation of PI3K promotes escape from hormone dependence in estrogen receptor-positive breast cancer | 83%      | 24    | RNA       | HG-U133_Plus_2           | Original normalization Re-normalized (IRMA) | Public  |
