# Supplementary material for: InSilico DB genomic datasets hub: an efficient starting point for analyzing genome-wide studies in GenePattern, Integrative Genomics Viewer, and R/Bioconductor
Source: Springer Nature journal article supplement (doi:10.1186/gb-2012-13-11-r104), 2012-11-18
Supplement: 13059_2012_2971_MOESM5_ESM.pdf [file 13059_2012_2971_MOESM5_ESM.pdf]

4 Add curation from CSV
 5 Edit
 6 Flag
 7 Download as txt
 Save as new version
 Cancel edit

Actions on selected column
   
 Change header column
   
8 Remove column
   
 Duplicate column
   
 Search & replace in column
   
 Text to column tool
   
 Multiple column by

3 Geo annotations
   
 (hours) ER Activation Experiment Type Perturbagen Cell Line Concentration

| GSM ID    | ER Activation | Experiment Type | Perturbagen     | Cell Line | Concentration |
|-----------|---------------|-----------------|-----------------|-----------|---------------|
| GSM118651 | antagonist    | treatment       | tamoxifen       | MCF7      | .000001       |
| GSM118652 | antagonist    | treatment       | raloxifene      | MCF7      | .0000001      |
| GSM118653 | antagonist    | treatment       | fulvestrant     | MCF7      | .00000001     |
| GSM118654 | antagonist    | treatment       | fulvestrant     | MCF7      | .000001       |
| GSM118655 | antagonist    | treatment       | tamoxifen       | MCF7      | .000001       |
| GSM119178 | antagonist    | treatment       | fulvestrant     | MCF7      | .000001       |
| GSM119225 | antagonist    | treatment       | fulvestrant     | MCF7      | .000001       |
| GSM119254 | antagonist    | treatment       | fulvestrant     | MCF7      | .00000001     |
| GSM118730 | agonist       | treatment       | estradiol       | MCF7      | .00000001     |
| GSM118732 | agonist       | treatment       | alpha-estradiol | MCF7      | .00000001     |
| GSM118781 | agonist       | treatment       | genistein       | MCF7      | .000001       |
| GSM118782 | agonist       | treatment       | genistein       | MCF7      | .000001       |
| GSM118833 | agonist       | treatment       | estradiol       | MCF7      | .0000001      |
| GSM118842 | agonist       | treatment       | estradiol       | ssMCF7    | .00000001     |
| GSM118854 | agonist       | treatment       | genistein       | MCF7      | .00001        |
| GSM118857 | agonist       | treatment       | estradiol       | HL60      | .00000001     |
| GSM118865 | agonist       | treatment       | alpha-estradiol | ssMCF7    | .00000001     |
| GSM118879 | agonist       | treatment       | estradiol       | ssMCF7    | .00000001     |
| GSM119036 | agonist       | treatment       | genistein       | MCF7      | .00001        |
| GSM119061 | agonist       | treatment       | alpha-estradiol | MCF7      | .00000001     |
| GSM119063 | agonist       | treatment       | estradiol       | HL60      | .00000001     |
| GSM119181 | agonist       | treatment       | estradiol       | MCF7      | .0000001      |

Clinical annotation (tree view)

- GSE5258
  - Annotations
    - Cell Line (564)
    - Cmap Well (564)
    - Concentration (M) (564)
    - ER Activation (564)
      - agonist(20)
      - antagonist(8)
      - NA(536)
    - Experiment Type (564)
    - Perturbagen (564)
    - Treatment Time (hours) (564)
    - Vehicle (564)
    - Vehicle Final (564)
  - Data
