# Supplementary material for: InSilico DB genomic datasets hub: an efficient starting point for analyzing genome-wide studies in GenePattern, Integrative Genomics Viewer, and R/Bioconductor
Source: Springer Nature journal article supplement (doi:10.1186/gb-2012-13-11-r104), 2012-11-18
Supplement: 13059_2012_2971_MOESM6_ESM.pdf [file 13059_2012_2971_MOESM6_ESM.pdf]

**INSILICO** View and edit clinical annotations of dataset GSE5258 Samples basket (13)

(a) **InSilico Clinical Annotations: Connectivity Map dataset (build01)**

Curation versions: colin molter 2012-01-24 Edit Flag Delete Curation Add curation from CSV

| InSilico Clinical Annotations (grid view)      |           |                           | Geo annotations | Clinical annotation (tree view) |                         |
|------------------------------------------------|-----------|---------------------------|-----------------|---------------------------------|-------------------------|
| ids                                            | Cell Line | Perturbagen               |                 |                                 |                         |
| <span style="color: green;">+</span> GSM118730 | MCF7      | estradiol                 |                 |                                 | GSE5258-GPL96           |
| <span style="color: red;">-</span> GSM118732   | MCF7      | alpha-estradiol           |                 |                                 | Annotations             |
| <span style="color: red;">-</span> GSM118781   | MCF7      | genistein                 |                 |                                 | Cell Line (346)         |
| <span style="color: red;">-</span> GSM118782   | MCF7      | genistein                 |                 |                                 | Cmap Well (346)         |
| <span style="color: red;">-</span> GSM118833   | MCF7      | estradiol                 |                 |                                 | Concentration (M) (346) |
|                                                |           |                           |                 |                                 | Estrogen Impact (346)   |
|                                                |           |                           |                 |                                 | Experiment Type (346)   |
| <span style="color: red;">-</span> GSM119061   | MCF7      | alpha-estradiol           |                 |                                 | hours (346)             |
| <span style="color: green;">+</span> GSM119063 | HL60      | estradiol                 |                 |                                 | 6)                      |
| <span style="color: green;">+</span> GSM119063 | MCF7      | estradiol                 |                 |                                 |                         |
| <span style="color: red;">-</span> GSM119036   | MCF7      | genistein                 |                 |                                 |                         |
| <span style="color: red;">-</span> GSM119061   | MCF7      | alpha-estradiol           |                 |                                 |                         |
| <span style="color: green;">+</span> GSM119063 | HL60      | estradiol                 |                 |                                 |                         |
| <span style="color: green;">+</span> GSM118761 | MCF7      | tomelukast                |                 |                                 |                         |
| <span style="color: green;">+</span> GSM118750 | MCF7      | null                      |                 |                                 |                         |
| <span style="color: green;">+</span> GSM118752 | MCF7      | nordihydroguaiaretic acid |                 |                                 |                         |
| <span style="color: green;">+</span> GSM118748 | MCF7      | tacrolimus                |                 |                                 |                         |

Page 1 of 4 Samples displayed 1 - 100 of 346 Previous study Next study

**INSILICO** Merge cherry-picked samples into a new dataset Samples basket (13) colinm ?

(b) Actions on selected column Remove samples Save curation

| Clinical annotations (grid view) |           |                 |                   |                 | Clinical annotation (tree view) |                             |
|----------------------------------|-----------|-----------------|-------------------|-----------------|---------------------------------|-----------------------------|
| ids                              | Cell Line | Perturbagen     | Concentration (M) | Estrogen Impact |                                 |                             |
| GSM118730                        | MCF7      | estradiol       | .00000001         | agonist         |                                 | NEW SERIES                  |
| GSM118732                        | MCF7      | alpha-estradiol | .00000001         | agonist         |                                 | Annotations                 |
| GSM118738                        | MCF7      | tamoxifen       | .000001           | antagonist      |                                 | Cell Line (13)              |
| GSM118751                        | MCF7      | raloxifene      | .00000001         | antagonist      |                                 | Cmap Well (13)              |
| GSM118781                        | MCF7      | genistein       | .000001           | agonist         |                                 | Concentration (M) (13)      |
| GSM118782                        | MCF7      | genistein       | .000001           | agonist         |                                 | Estrogen Impact (13)        |
| GSM118792                        | MCF7      | fulvestrant     | .00000001         | antagonist      |                                 | agonist(8)                  |
| GSM118833                        | MCF7      | estradiol       | .00000001         | agonist         |                                 | antagonist(5)               |
| GSM118836                        | MCF7      | fulvestrant     | .000001           | antagonist      |                                 | Experiment Type (13)        |
| GSM118851                        | MCF7      | tamoxifen       | .000001           | antagonist      |                                 | Perturbagen (13)            |
| GSM118854                        | MCF7      | genistein       | .000001           | agonist         |                                 | Treatment Time (hours) (13) |
| GSM119036                        | MCF7      | genistein       | .000001           | agonist         |                                 | Vehicle (13)                |
| GSM119061                        | MCF7      | alpha-estradiol | .00000001         | agonist         |                                 | Vehicle Final (13)          |
|                                  |           |                 |                   |                 |                                 | Data                        |

Page 1 of 1 Samples displayed 1 - 13 of 13

**INSILICO** Merge cherry-picked samples into a new dataset colinm ?

(c) **ISDB Merged Dataset General Information**

Title: CMAP - mfc7 cell line - perturbagen impact on ER

Summary: This dataset is composed of a subset of samples from the CMAP dataset. Samples from the MFC7 cell line with perturbagen having estrogen impact were selected.

**ISDB Merged Dataset Privacy Setting**

Public  Private

**My basket**

Empty my basket

Save Cancel
