# Supplementary material for: InSilico DB genomic datasets hub: an efficient starting point for analyzing genome-wide studies in GenePattern, Integrative Genomics Viewer, and R/Bioconductor
Source: Springer Nature journal article supplement (doi:10.1186/gb-2012-13-11-r104), 2012-11-18

ER status

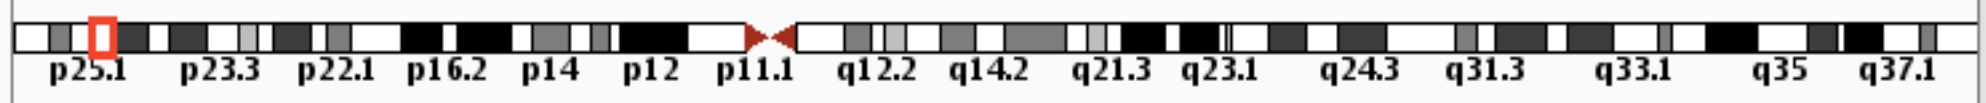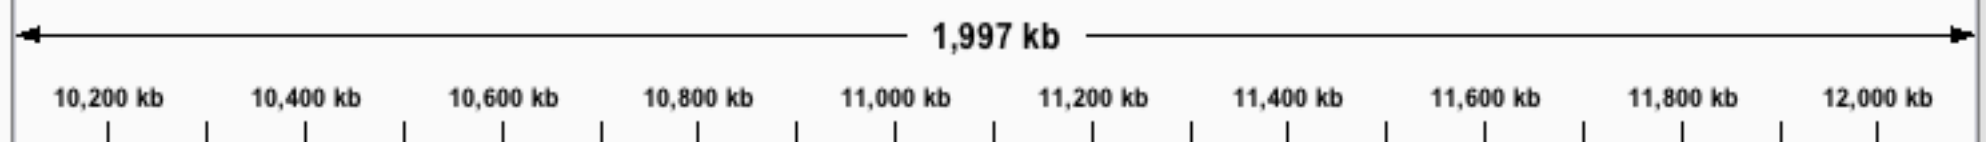

GSE20711

ER-

ER+

GSE27003

ISDB6354

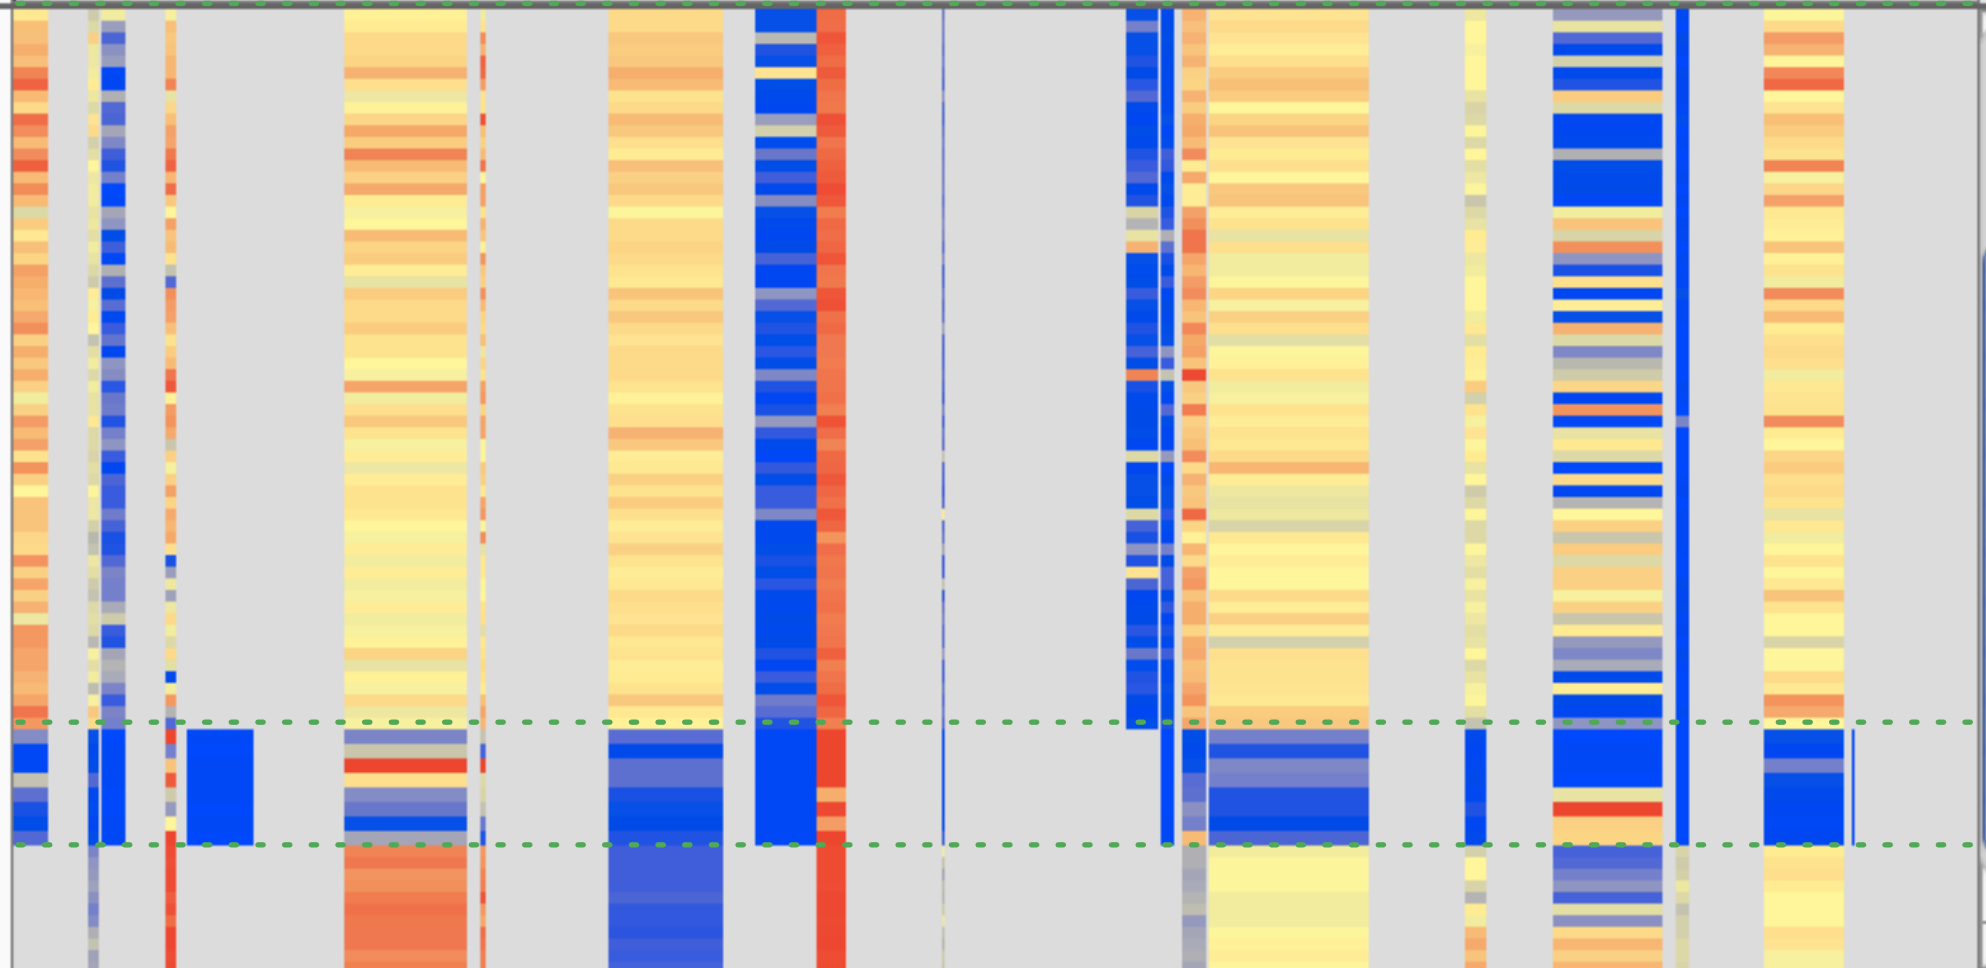

RefSeq Genes

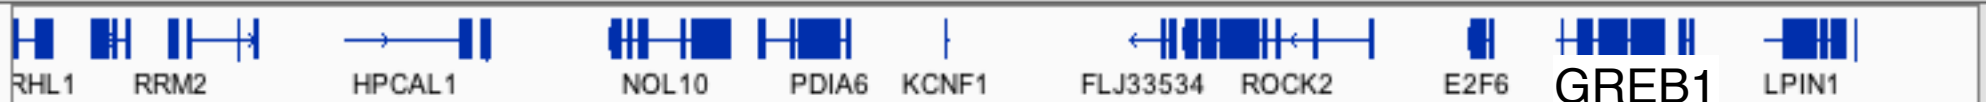

GSM665127  
GSE27003

GSM665129

GSM665131

GSM665132

GSM665128

GSM665130

GSM665133

GSM665134

ER-

ER+

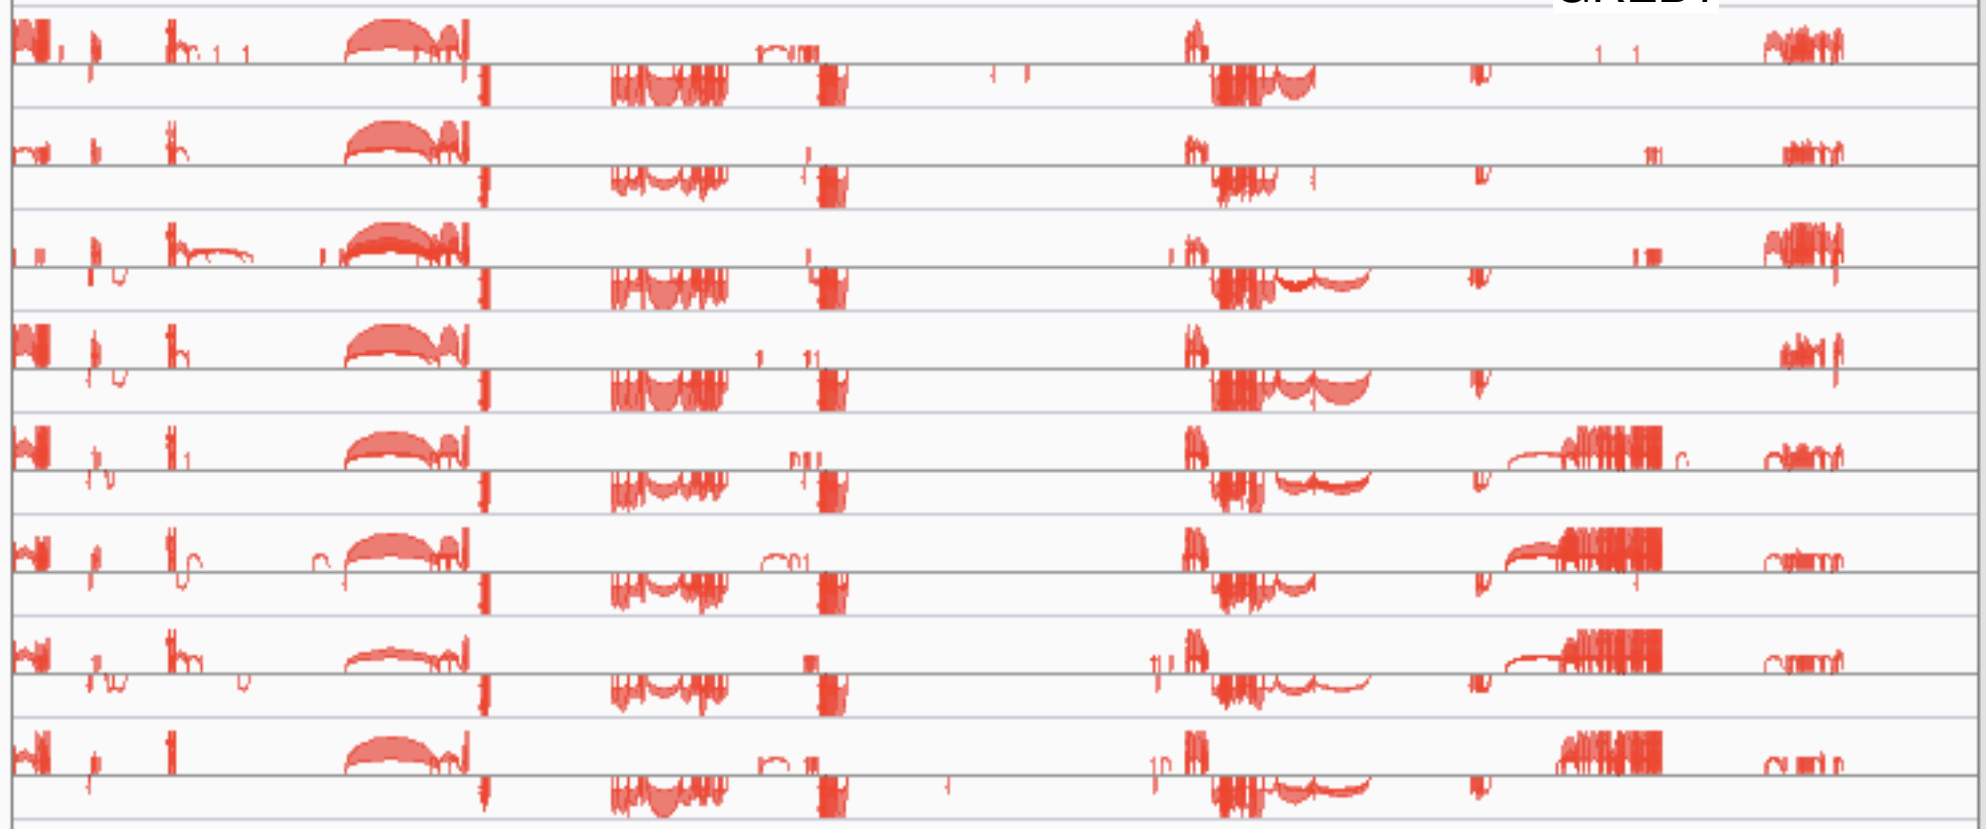

Supplement: 13059_2012_2971_MOESM7_ESM.pdf [file 13059_2012_2971_MOESM7_ESM.pdf]
