# Supplementary material for: InSilico DB genomic datasets hub: an efficient starting point for analyzing genome-wide studies in GenePattern, Integrative Genomics Viewer, and R/Bioconductor
Source: Springer Nature journal article supplement (doi:10.1186/gb-2012-13-11-r104), 2012-11-18
Supplement: 13059_2012_2971_MOESM8_ESM.pdf [file 13059_2012_2971_MOESM8_ESM.pdf]

a

## Breast Cancer (GSE20711)

Dedeurwaerder et al.  
Diseased tissue  
87 samples (42ER+/45ER-)

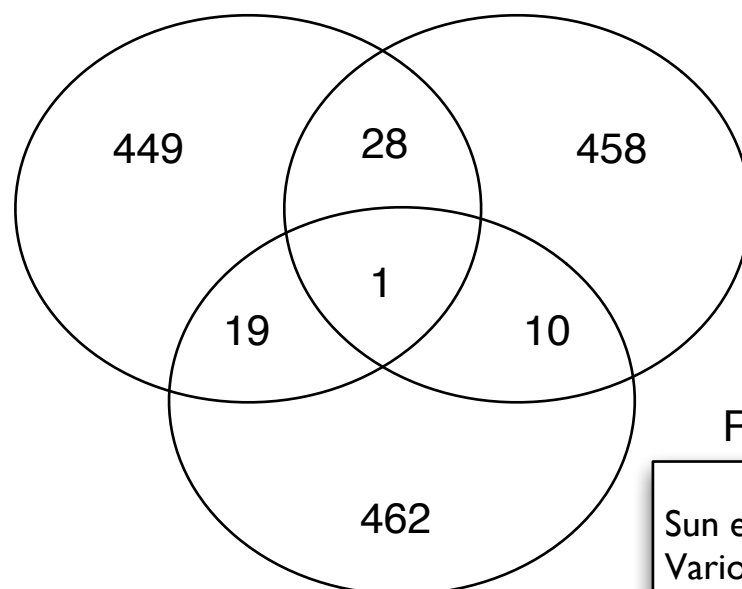

## C-MAP (ISDB6354)

Lamb et al.  
Perturbagen applied to cell lines  
13 samples (8ER+/5ER-)

## RNA-Seq (GSE27003)

Sun et al.  
Various cell lines  
8 Samples (4ER+/4ER-)

b

| Gene Set Name [# Genes (K)]                    | Description                                                                                                                                                                 | # Genes in Overlap (k) | k/K | p value ?             |
|------------------------------------------------|-----------------------------------------------------------------------------------------------------------------------------------------------------------------------------|------------------------|-----|-----------------------|
| SMID_BREAST_CANCER_BASAL_DN [713]              | Genes down-regulated in basal subtype of breast cancer samples.                                                                                                             | 23                     |     | 0 e <sup>0</sup>      |
| FARMER_BREAST_CANCER_BASAL_VS_LUMINAL [335]    | Genes which best discriminated between two groups of breast cancer according to the status of ESR1 and AR [Gene ID=2099, 367]: basal (ESR1- AR-) and luminal (ESR1+ AR+).   | 19                     |     | 0 e <sup>0</sup>      |
| SMID_BREAST_CANCER_LUMINAL_B_UP [175]          | Genes up-regulated in the luminal B subtype of breast cancer.                                                                                                               | 13                     |     | 2.22 e <sup>-16</sup> |
| DOANE_BREAST_CANCER_ESR1_UP [114]              | Genes changed in breast cancer samples according to the ESR1 [Gene ID=2099] status: ER positive vs ER negative tumors.                                                      | 10                     |     | 1.8 e <sup>-13</sup>  |
| FARMER_BREAST_CANCER_APOCRINE_VS_LUMINAL [329] | Genes which best discriminate between two groups of breast cancer according to the status of ESR1 and AR [Gene ID=2099, 367]: apocrine (ESR1- AR+) and luminal (ESR1+ AR+). | 11                     |     | 3.72 e <sup>-10</sup> |
